# Supplementary material for: A Review and Expert Opinion on the Neuropsychiatric Assessment of Motor Functional Neurological Disorders
Source: Atypon-hosted journal article supplement (doi:10.1176/appi.neuropsych.19120357), 2020-08-11
Supplement: appi.neuropsych.19120357.ds001.pdf [file appi.neuropsych.19120357.ds001.pdf]

## Supplementary References

- S1. LaFrance WC, Jr., Devinsky O. Treatment of nonepileptic seizures. *Epilepsy Behav.* 2002;3(5 Suppl):19-23.
- S2. Chastan N, Parain D. Psychogenic paralysis and recovery after motor cortex transcranial magnetic stimulation. *Mov Disord.* 2010;25(10):1501-4.
- S3. Jankovic J, Vuong KD, Thomas M. Psychogenic tremor: long-term outcome. *CNS Spectr.* 2006;11(7):501-8.
- S4. Munhoz RP, Zavala JA, Becker N, Teive HA. Cross-cultural influences on psychogenic movement disorders - a comparative review with a Brazilian series of 83 cases. *Clin Neuro Neurosurg.* 2011;113(2):115-8.
- S5. Lang AE, Koller WC, Fahn S. Psychogenic parkinsonism. *Arch Neurol.* 1995;52(8):802-10.
- S6. Kozłowska K, Nunn KP, Rose D, Morris A, Ouvrier RA, Varghese J. Conversion disorder in Australian pediatric practice. *J Am Acad Child Adolesc Psychiatry.* 2007;46(1):68-75.
- S7. Ferrara J, Jankovic J. Psychogenic movement disorders in children. *Mov Disord.* 2008;23(13):1875-81.
- S8. Schwingenschuh P, Pont-Sunyer C, Surtees R, Edwards MJ, Bhatia KP. Psychogenic movement disorders in children: a report of 15 cases and a review of the literature. *Mov Disord.* 2008;23(13):1882-8.
- S9. Dale RC, Singh H, Troedson C, Pillai S, Gaikiwari S, Kozłowska K. A prospective study of acute movement disorders in children. *Dev Med Child Neurol.* 2010;52(8):739-48.

- S10. Factor SA, Podskalny GD, Molho ES. Psychogenic movement disorders: frequency, clinical profile, and characteristics. *J Neurol Neurosurg Psychiatry*. 1995;59(4):406-12.
- S11. Kenney C, Diamond A, Mejia N, Davidson A, Hunter C, Jankovic J. Distinguishing psychogenic and essential tremor. *J Neurol Sci*. 2007;263(1-2):94-9.
- S12. Kim YJ, Pakiam AS, Lang AE. Historical and clinical features of psychogenic tremor: a review of 70 cases. *Can J Neurol Sci*. 1999;26(3):190-5.
- S13. Lang AE. Psychogenic dystonia: a review of 18 cases. *Can J Neurol Sci*. 1995;22(2):136-43.
- S14. Monday K, Jankovic J. Psychogenic myoclonus. *Neurology*. 1993;43(2):349-52.
- S15. Binzer M, Eisemann M. Childhood experiences and personality traits in patients with motor conversion symptoms. *Acta Psychiatrica Scandinavica*. 1998;98(4):288-95.
- S16. Driver-Dunckley E, Stonnington CM, Locke DE, Noe K. Comparison of psychogenic movement disorders and psychogenic nonepileptic seizures: is phenotype clinically important? *Psychosomatics*. 2011;52(4):337-45.
- S17. House AO, Andrews HB. Life events and difficulties preceding the onset of functional dysphonia. *J Psychosom Res*. 1988;32(3):311-9.
- S18. Kirshner LA, Kaplan N. Conversion as a manifestation of crisis in the life situation: A report of seven cases of ataxia and paralysis of the lower extremities. *Compr Psychiatry*. 1970;11(3):260-6.
- S19. Watanabe TK, O'Dell MW, Togliatti TJ. Diagnosis and rehabilitation strategies for patients with hysterical hemiparesis: a report of four cases. *Arch Phys Med Rehabil*. 1998;79(6):709-14.

- S20. Singh SP, Lee AS. Conversion disorders in Nottingham: alive, but not kicking. *J Psychosom Res.* 1997;43(4):425-30.
- S21. Stone J, Sharpe M, Binzer M. Motor conversion symptoms and pseudoseizures: a comparison of clinical characteristics. *Psychosomatics.* 2004;45(6):492-9.
- S22. Tan EK, Jankovic J. Psychogenic hemifacial spasm. *J Neuropsychiatry Clin Neurosci.* 2001;13(3):380-4.
- S23. Ertan S, Uluduz D, Ozekmekci S, Kiziltan G, Ertan T, Yalcinkaya C, et al. Clinical characteristics of 49 patients with psychogenic movement disorders in a tertiary clinic in Turkey. *Mov Disord.* 2009;24(5):759-62.
- S24. Schrag A, Trimble M, Quinn N, Bhatia K. The syndrome of fixed dystonia: an evaluation of 103 patients. *Brain.* 2004;127(Pt 10):2360-72.
- S25. Mejia NI, Jankovic J. Secondary tics and tourettism. *Braz J Psychiatry.* 2005;27(1):11-7.
- S26. van der Salm SM, Koelman JH, Henneke S, van Rootselaar AF, Tijssen MA. Axial jerks: a clinical spectrum ranging from propriospinal to psychogenic myoclonus. *J Neurol.* 2010;257(8):1349-55.
- S27. Ranawaya R, Riley D, Lang A. Psychogenic dyskinesias in patients with organic movement disorders. *Mov Disord.* 1990;5(2):127-33.
- S28. Grattan-Smith P, Fairley M, Procopis P. Clinical features of conversion disorder. *Arch Dis Child.* 1988;63(4):408-14.
- S29. Shill H, Gerber P. Evaluation of clinical diagnostic criteria for psychogenic movement disorders. *Mov Disord.* 2006;21(8):1163-8.

- S30. Schulte-Korne G, Remschmidt H. [Familial clustering of conversion disorder]. *Der Nervenarzt*. 1996;67(9):794-8.
- S31. Stoltenborgh M, van Ijzendoorn MH, Euser EM, Bakermans-Kranenburg MJ. A global perspective on child sexual abuse: meta-analysis of prevalence around the world. *Child Maltreat*. 2011;16(2):79-101.
- S32. Sar V, Akyuz G, Kundakci T, Kiziltan E, Dogan O. Childhood trauma, dissociation, and psychiatric comorbidity in patients with conversion disorder. *Am J Psychiatry*. 2004;161(12):2271-6.
- S33. Seltzer WJ. Conversion disorder in childhood and adolescence: A familial/cultural approach Part I. *Family Systems Medicine*. 1985;3(3):261-80.
- S34. Feinstein A, Stergiopoulos V, Fine J, Lang AE. Psychiatric outcome in patients with a psychogenic movement disorder: a prospective study. *Neuropsychiatry Neuropsychol Behav Neurol*. 2001;14(3):169-76.
- S35. Roelofs K, Keijsers GP, Hoogduin KA, Naring GW, Moene FC. Childhood abuse in patients with conversion disorder. *Am J Psychiatry*. 2002;159(11):1908-13.
- S36. Kravitz H, Gomberg RM, Burnstine RC, Hagler S, Korach A. Psychogenic cough tic in children and adolescents. Nine case histories illustrate the need for re-evaluation of this common but frequently unrecognized problem. *Clin Pediatr* 1969;8(10):580-3.
- S37. Guz H, Doganay Z, Ozkan A, Colak E, Tomac A, Sarisoy G. Conversion and somatization disorders; dissociative symptoms and other characteristics. *J Psychosom Res*. 2004;56(3):287-91.

- S38. Spitzer C, Spelsberg B, Grabe HJ, Mundt B, Freyberger HJ. Dissociative experiences and psychopathology in conversion disorders. *J Psychosom Res.* 1999;46(3):291-4.
- S39. Espirito-Santo H, Pio-Abreu JL. Psychiatric symptoms and dissociation in conversion, somatization and dissociative disorders. *Aust N Z J Psychiatry.* 2009; 43:270-276
- S40. Guz H, Doganay Z, Ozkan A, et al. Conversion disorder and its subtypes: a need for a reclassification. *Nord J Psychiatry.* 2003; 57:377-381
- S41. Roelofs K, Hoogduin KA, Keijsers GP, Näring GW, Moene FC, Sandijck P. Hypnotic susceptibility in patients with conversion disorder. *J Abnorm Psychol.* 2002;111(2):390.
- S42. Moene FC, Spinhoven P, Hoogduin K, Sandyck P, Roelofs K. Hypnotizability, dissociation and trauma in patients with a conversion disorder: an exploratory study. *Clin Psychol Psychother.* 2001;8:400-10.
- S43. Foong J, Lucas PA, Ron MA. Interrogative suggestibility in patients with conversion disorders. *J Psychosom Res.* 1997;43(3):317-21.
- S44. Binzer M. Hopelessness and locus of control in patients with motor conversion disorder. *Nord J Psychiatry.* 1999;53:37-40.
- S45. van Beilen M, Griffioen BT, Leenders KL. Coping strategies and IQ in psychogenic movement disorders and paralysis. *Mov Disord.* 2009;24(6):922-5.
- S46. Vasudevan A, Raj HS. Certain personality variables in hysteria. *Psychological Studies.* 1988;33(3):170-4.
- S47. Williams DT, Ford B, Fahn S. Phenomenology and psychopathology related to psychogenic movement disorders. *Advances in Neurology.* 1995;65:231-57.

- S48. Binzer M, Andersen PM, Kullgren G. Clinical characteristics of patients with motor disability due to conversion disorder: a prospective control group study. *J Neurol Neurosurg Psychiatry*. 1997;63(1):83-8.
- S49. Sa DS, Mailis-Gagnon A, Nicholson K, Lang AE. Posttraumatic painful torticollis. *Mov Disord*. 2003;18(12):1482-91.
- S50. Mucha TF, Reinhardt RF. Conversion reactions in student aviators. *Am J Psychiatry*. 1970;127(4):493-7.
- S51. Chabrol H, Peresson G, Clanet M. Lack of specificity of the traditional criteria for conversion disorders. *Eur Psychiatry*. 1995;10(6):317-9.
- S52. Criswell S, Sterling C, Swisher L, Evanoff B, Racette BA. Sensitivity and specificity of the finger tapping task for the detection of psychogenic movement disorders. *Parkinsonism Relat Disord*. 2010;16(3):197-201.
- S53. Okun MS, Koehler PJ. Babinski's Clinical Differentiation of Organic Paralysis From Hysterical Paralysis. *Archives of Neurology*. 2004;61(5):778-83.
- S54. Sonoo M. Abductor sign: a reliable new sign to detect unilateral non-organic paresis of the lower limb. *J Neurol Neurosurg Psychiatry*. 2004;75(1):121-5.
- S55. Tinazzi M, Simonetto S, Franco L, Bhatia KP, Moretto G, Fiaschi A, et al. Abduction finger sign: a new sign to detect unilateral functional paralysis of the upper limb. *Mov Disord*. 2008;23(16):2415-9.
- S56. Yugue I, Shiba K, Ueta T, Iwamoto Y. A new clinical evaluation for hysterical paralysis. *Spine (Phila Pa 1976)*. 2004;29(17):1910-3; discussion 3.
- S57. Baker JH, Silver JR. Hysterical paraplegia. *J Neurol Neurosurg Psychiatry*. 1987;50(4):375-82.

- S58. Okun MS, Rodriguez RL, Foote KD, Fernandez HH. The "chair test" to aid in the diagnosis of psychogenic gait disorders. *The Neurologist*. 2007;13(2):87-91.
- S59. Thenganatt MA, Jankovic J. Psychogenic (functional) parkinsonism. *Handbook of Clinical Neurology*. 2016;139:259-62.
- S60. Oberfield RA, Reuben RN, Burkes LJ. Interdisciplinary approach to conversion disorders in adolescent girls. *Psychosomatics*. 1983;24(11):983-9.
- S61. Ahmed MA, Martinez A, Yee A, Cahill D, Besag FM. Psychogenic and organic movement disorders in children. *Dev Med Child Neurol*. 2008;50(4):300-4.
- S62. McAuley JH, Rothwell JC, Marsden CD, Findley LJ. Electrophysiological aids in distinguishing organic from psychogenic tremor. *Neurology*. 1998;50(6):1882-4.
- S63. Koller W, Lang A, Vetere-Overfield B, Findley L, Cleeves L, Factor S, et al. Psychogenic tremors. *Neurology*. 1989;39(8):1094-.
- S64. O'Suilleabhain PE, Matsumoto JY. Time-frequency analysis of tremors. *Brain*. 1998;121 ( Pt 11):2127-34.
- S65. Deuschl G, Koster B, Lucking CH, Scheidt C. Diagnostic and pathophysiological aspects of psychogenic tremors. *Mov Disord*. 1998;13(2):294-302.
- S66. Milanov I. Clinical and electromyographic examinations of patients with psychogenic tremor. *Electromyogr Clin Neurophysiol*. 2002;42(7):387-92.
- S67. Thompson PD, Colebatch JG, Brown P, Rothwell JC, Day BL, Obeso JA, et al. Voluntary stimulus-sensitive jerks and jumps mimicking myoclonus or pathological startle syndromes. *Mov Disord*. 1992;7(3):257-62.
- S68. McComas AJ, Kereshi S, Quinlan J. A method for detecting functional weakness. *J Neurol Neurosurg Psychiatry*. 1983;46(3):280-2.

- S69. Kumru H, Begeman M, Tolosa E, Valls-Sole J. Dual task interference in psychogenic tremor. *Mov Disord*. 2007;22(14):2077-82.
- S70. Raethjen J, Kopper F, Govindan RB, Volkmann J, Deuschl G. Two different pathogenetic mechanisms in psychogenic tremor. *Neurology*. 2004;63(5):812-5.
- S71. Piboolnurak P, Rothery N, Ahmed A, Ford B, Yu Q, Xu D, et al. Psychogenic tremor disorders identified using tree-based statistical algorithms and quantitative tremor analysis. *Mov Disord*. 2005;20(12):1543-9.
- S72. Terada K, Ikeda A, Van Ness PC, Nagamine T, Kaji R, Kimura J, et al. Presence of Bereitschaftspotential preceding psychogenic myoclonus: clinical application of jerk-locked back averaging. *J Neurol Neurosurg Psychiatry*. 1995;58(6):745-7.
- S73. Pillai JJ, Markind S, Streletz LJ, Field HL, Herbison G. Motor evoked potentials in psychogenic paralysis. *Neurology*. 1992;42(4):935-6.
- S74. Meyer BU, Britton TC, Benecke R, Bischoff C, Machetanz J, Conrad B. Motor responses evoked by magnetic brain stimulation in psychogenic limb weakness: diagnostic value and limitations. *Journal of Neurology*. 1992;239(5):251-5.
- S75. Jellinek D, Bradford R, Bailey I, Symon L. The role of motor evoked potentials in the management of hysterical paraplegia: case report. *Spinal Cord*. 1992;30(4):300.
- S76. Morota N, Deletis V, Kiproviski K, Epstein F, Abbott R. The use of motor evoked potentials in the diagnosis of psychogenic quadriplegia. A case study. *Pediatric Neurosurgery*. 1994;20(3):203-6.
- S77. Janssen BA, Theiler R, Grob D, Dvorak J. The role of motor evoked potentials in psychogenic paralysis. *Spine*. 1995;20(5):608-11.



- S78. Foong J, Ridding M, Cope H, Marsden C, Ron M. Corticospinal function in conversion disorder. *J Neuropsychiatry Clin Neurosci*. 1997;9(2):302-3.
- S79. Sue CM, Yiannikas C, Clouston PD, Lim CL, Graham S. Transcranial cortical stimulation in disorders of the central motor pathways. *J Clin Neurosci*. 1997;4(1):19-25.
- S80. Cantello R, Boccagni C, Comi C, Civardi C, Monaco F. Diagnosis of psychogenic paralysis: the role of motor evoked potentials. *Journal of Neurology*. 2001;248(10):889-97.
- S81. Morita H, Shimojima Y, Nishikawa N, Hagiwara N, Amano N, Ikeda S. Size variance of motor evoked potential at initiation of voluntary contraction in palsy of conversion disorder. *Psychiatry Clin Neurosci*. 2008;62(3):286-92.
- S82. Liepert J, Hassa T, Tuscher O, Schmidt R. Electrophysiological correlates of motor conversion disorder. *Mov Disord*. 2008;23(15):2171-6.
- S83. Liepert J, Hassa T, Tuscher O, Schmidt R. Abnormal motor excitability in patients with psychogenic paresis. A TMS study. *Journal of Neurology*. 2009;256(1):121-6.
- S84. Quartarone A, Rizzo V, Terranova C, Morgante F, Schneider S, Ibrahim N, et al. Abnormal sensorimotor plasticity in organic but not in psychogenic dystonia. *Brain*. 2009;132(Pt 10):2871-7.
- S85. Avanzino L, Martino D, van de Warrenburg BP, Schneider SA, Abbruzzese G, Defazio G, et al. Cortical excitability is abnormal in patients with the "fixed dystonia" syndrome. *Mov Disord*. 2008;23(5):646-52.
- S86. Bartova P, Kraft O, Bernatek J, Havel M, Ressner P, Langova K, et al. Transcranial sonography and (123)I-FP-CIT single photon emission computed tomography in movement disorders. *Ultrasound in Medicine & Biology*. 2014;40(10):2365-71.

S87. Serrano Vicente J, Garcia Bernardo L, Duran Barquero C, Constantino Silva A, Infante de la Torre JR, Dominguez Grande ML, et al. [Negative predictive value of (123)I loflupane SPECT in movement disorders]. *Revista espanola de medicina nuclear*. 2009;28(1):2-5.

S88. Jaukovic L, Ilic TV, Dopudja M, Ajdinovic B. 123I-FP-CIT brain SPECT (DaTSCAN) imaging in the diagnosis of patients with movement disorders--first results. *Vojnosanitetski pregled*. 2012;69(2):157-62.

S89. Manto M-U. Discrepancy between dysmetric centrifugal movements and normometric centripetal movements in psychogenic ataxia. *European Neurology*. 2001;45(4):261-5.

S90. Fahn S. The Role of Anesthesia in the Diagnosis and Treatment of Psychogenic Movement Disorders. *Psychogenic movement disorders: Neurology and Neuropsychiatry*. Philadelphia, PA, US: Lippincott Williams & Wilkins Publishers; 2006. p. 256-61.
